# Supplementary material for: Earthquake detection capacity of the Dense Oceanfloor Network system for Earthquakes and Tsunamis (DONET)
Source: Research Square preprint supplement (doi:10.21203/rs.3.rs-3375761/v1), 2023-09-28
Supplement: Supplementary file 1 [file d5d77ca8bca5d2bcbfb7ca6b.docx]

Supplementary Materials for

Earthquake detection capacity of the Dense Oceanfloor Network system for Earthquakes and Tsunamis (DONET)

K. Z. Nanjo*, Y. Yamamoto, K. Ariyoshi, H. Horikawa, S. Yada, N. Takahashi

*Correspondence to: nanjo@u-shizuoka-ken.ac.jp

**This file includes:** Supplementary Figs. S1-S4.


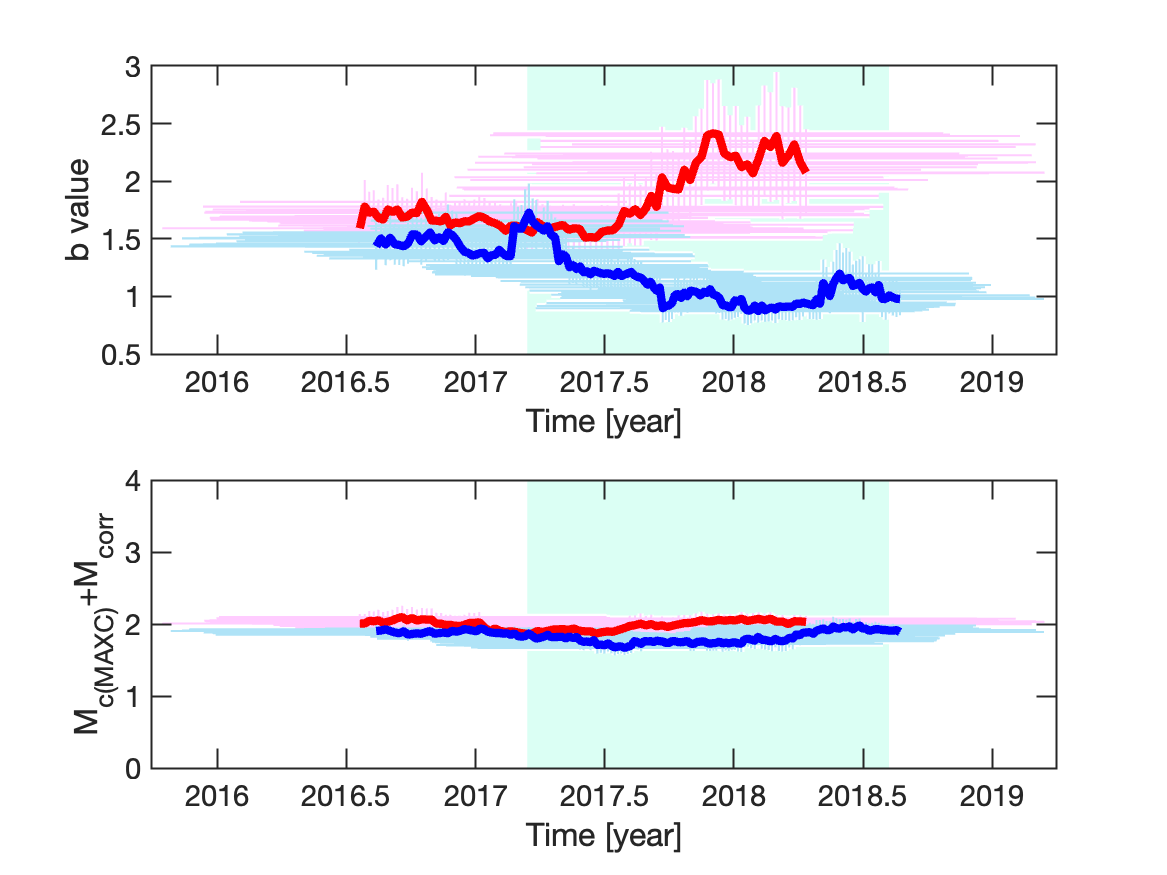


**Supplementary Fig. S1** Same as the thick red and blue curves in Fig. 8**a**,**b**, except that the windows covering 80 events (horizontal bars) are included inthe top and bottom panels.


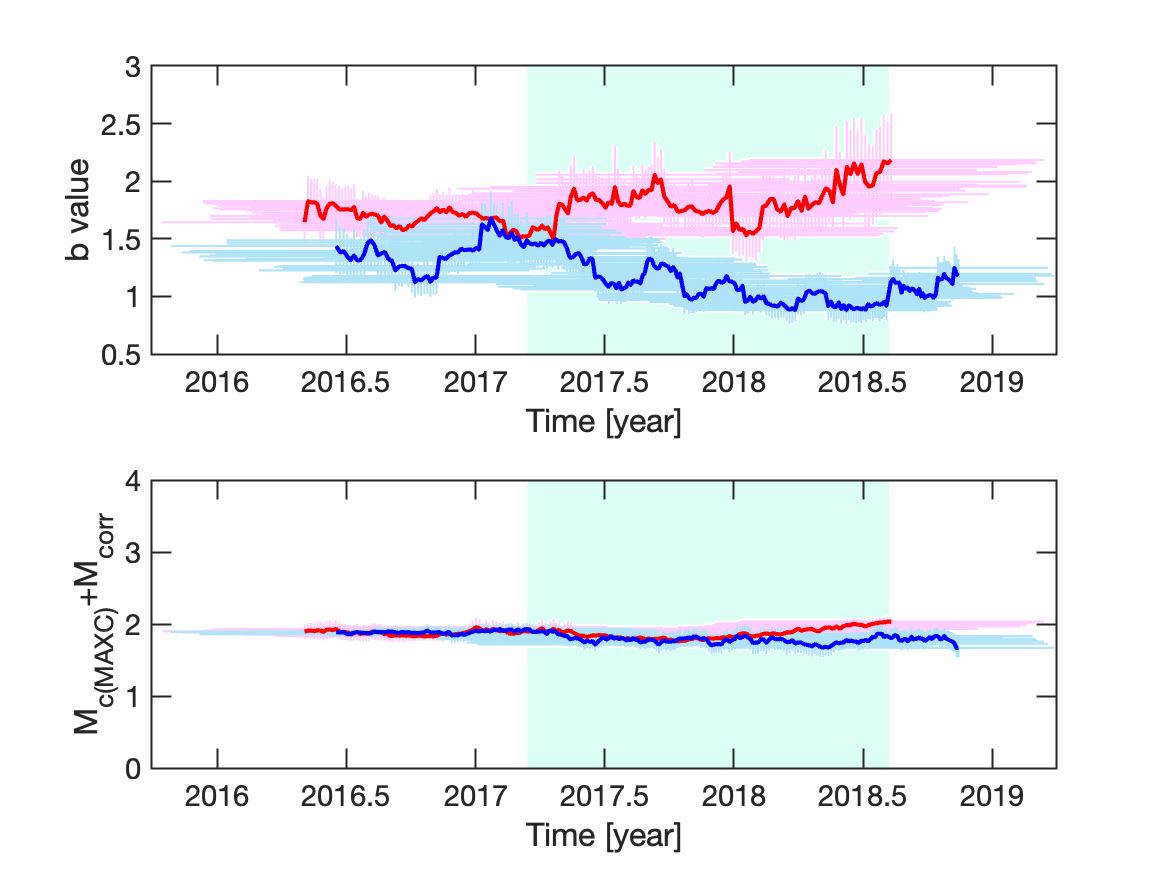


**Supplementary Fig. S2** Same as the thin red and blue curves in Fig. 8**a**,**b**, except that the windows covering 80 events (horizontal bars) are included inthe top and bottom panels.


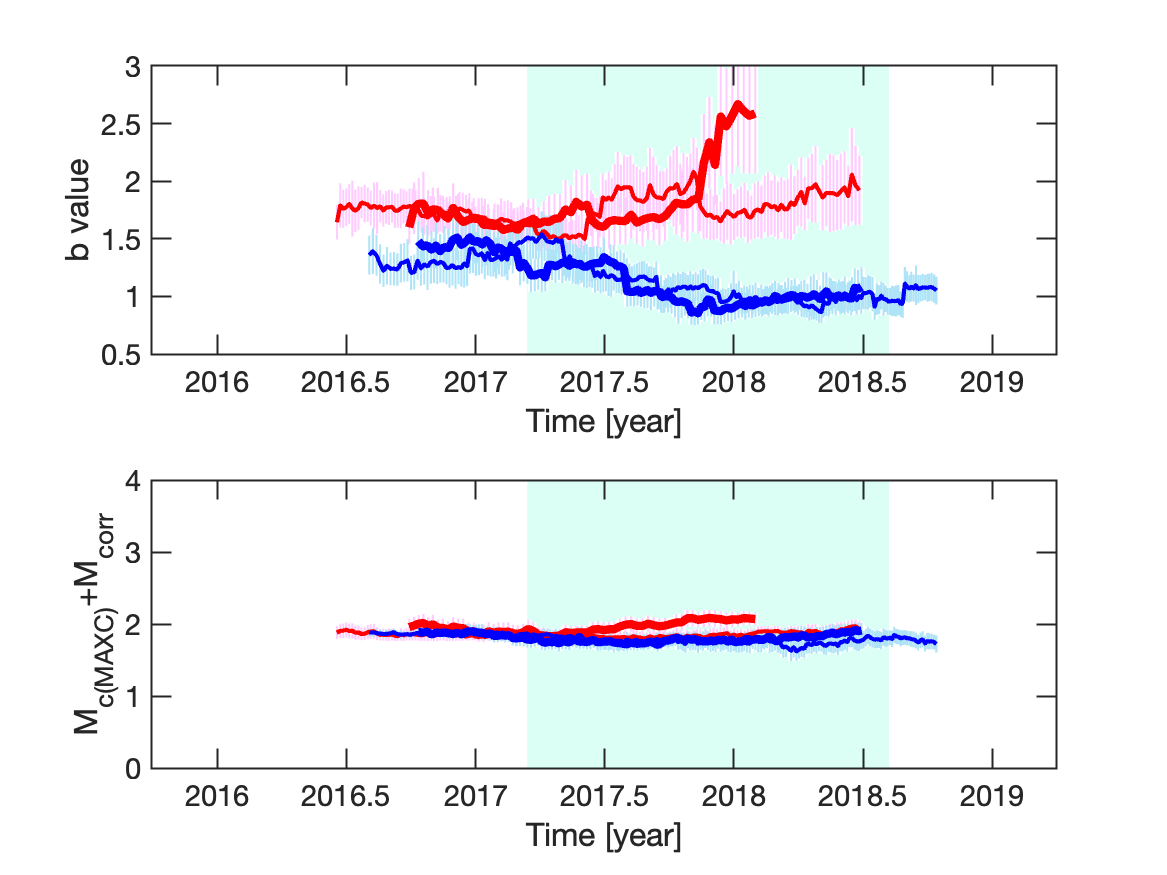


**Supplementary Fig. S3** Same as Fig. 8**a**,**b** for the window covering 100 events.

**Supplementary Fig. S4** Plot of *b* as a function of time for using the JMA catalog. **a**, Red curve: seismicity in the pink rectangle in Fig. 1**a** in a depth of 20-60 km (this depth is the same as that used by Nanjo and Yoshida 2018). We used the same moving window (80 earthquakes) as that for Fig. 8. Each *b* value was computed for events with *M*≥*M*c(EMR), and plotted at the mean of the occurrence times of earthquakes covered by the window, where *M*c(EMR) (*M*c computed by using the EMR method: Woessner and Wiemer 2005) is the same as that used by Nanjo and Yoshida (2018). Blue curve: same as the red curve for seismicity in the blue rectangle in Fig. 1**a**. See the caption in Fig. 8 for an explanation of a green region. **b**, Same as **a** for *M*c(EMR). **c**, Frequency-magnitude distribution of earthquakes for the period same as that used in Fig. 8**c** (this period is indicated by the vertical grey lines in **a** and **b**). Asterisks: seismicity used for the red curves in **a** and **b**. Circles: same as the asterisks for the blue curves in **a** and **b**. The procedure to compute *b* and *M*c(EMR) is the same as that used in **a** and **b**. log*P*b=-0.58 indicates an insignificant difference in *b*.
